# Supplementary material
Source: MDPI journal article supplement (https://www.mdpi.com/1999-4907/9/10/590)
Supplement: s1 [file s1]

## Sheet: Table S1-S12
Table S1	Primary facilitators and instruments: roundwood production from private forests1 .
			Thematic issue: Roundwood production from private forests
	region	actor type	main facilitators					most appropriate instruments								N
			State (Ministry)	Market (private economy)	Society (unions, associations, citizens´ initiatives)	individual citizens / forest owners	leave it to nature	laws (dictates, bans)	standards/norms	taxes / duties	positive financial incentives (subsidies, financing)	awareness raising, public relations	advice and training	exchange offers, contracts by private law	liberal formation of prices (supply, demand)
	SPAIN (Castilla y León)	Government actors	22.2222	33.3333	11.1111	33.3333	0	24.0741	20.3704	1.85185	5.55556	7.40741	3.7037	22.2222	14.8148	9
		Associations (industry, energy)	50	0	0	50	0	25	25	0	25	0	0	0	25	2
		Associations (biomass producers)	0	100	0	0	0	33.3333	0	0	33.3333	0	16.6667	16.6667	0	1
		Associations (national/local, of private owners)	0	33.3333	33.3333	33.3333	0	0	22.2222	0	44.4444	0	27.7778	0	5.55556	3
		Associations (professional/foresters' societies)	100	0	0	0	0	0	0	0	50	16.6667	0	0	33.3333	1
		Industry (forest, energy/utilities)	0	25	0	75	0	0	16.6667	0	0	0	0	41.6667	41.6667	4
		SMEs (technical/forest services, trade)	0	0	0	100	0	8.33333	25	0	0	16.6667	16.6667	25	8.33333	2
		Private forest owners	0	100	0	0	0	0	33.3333	0	0	0	0	33.3333	33.3333	1
		Research institutions	50	50	0	0	0	16.6667	8.33333	0	25	0	0	25	25	2
	PT, N-E	Government actors	33.3333	33.3333	0	33.3333	0	16.6667	11.1111	0	0	0	44.4444	11.1111	16.6667	3
		Associations (national/local, of private owners)	0	0	14.2857	85.7143	0	4.7619	4.7619	4.7619	7.14286	0	26.1905	23.8095	28.5714	7
		SMEs (technical/forest services, trade)	0	0	0	100	0	0	0	33.3333	16.6667	0	0	0	50	1
	LATVIA	Government actors	0	100	0	0	0	5.55556	5.55556	22.2222	16.6667	11.1111	16.6667	0	22.2222	3
		Associations (industry, energy)	50	25	0	25	0	25	0	12.5	20.8333	25	0	4.16667	12.5	4
		Associations (biomass producers)	0	100	0	0	0	33.3333	0	0	16.6667	50	0	0	0	1
		Industry (forest, energy/utilities, pellet)	27.2727	18.1818	18.1818	36.3636	0	29.6875	0	9.375	23.4375	9.375	4.6875	4.6875	18.75	11
		SMEs (technical/forest services, trade)	60	10	10	20	0	30	0	10	21.6667	11.6667	8.33333	0	18.3333	10
		Private forest owners (industrial)	0	100	0	0	0	33.3333	0	0	0	33.3333	0	0	33.3333	1
		Research institutions	0	66.6667	0	33.3333	0	33.3333	0	5.55556	16.6667	16.6667	16.6667	0	11.1111	3
	SLOVENIA	Government actors	0	25	0	75	0	8.33333	14.5833	16.6667	29.1667	4.16667	8.33333	8.33333	10.4167	9.33333
		Associations (national/local, of private owners)	0	17.8571	3.57143	78.5714	0	3.7037	11.7284	12.3457	16.0494	3.7037	20.3704	1.85185	30.2469	33.8333
		Industry (forest, energy/utilities)	0	100	0	0	0	50	33.3333	16.6667	0	0	0	0	0	1.16667
		SMEs (technical/forest services, trade)	0	50	0	50	0	0	8.33333	16.6667	0	0	50	0	25	2.33333
		Research institutions	0	0	0	100	0	0	16.6667	33.3333	0	0	0	0	50	1.16667
	GERMANY (Bavaria)	Government actors	12.8834	22.6994	8.58896	53.9877	1.84049	5.62771	11.6883	2.81385	21.3203	16.6667	26.8398	0.4329	14.6104	161
		Associations (tourism and nature conservation)	18.1818	9.09091	9.09091	63.6364	0	4.54545	3.0303	0	24.2424	28.7879	37.8788	0	1.51515	11
		Associations (hunting, local/national)	0	23.5294	0	76.4706	0	13.7931	3.44828	0	17.2414	10.3448	18.3908	9.1954	27.5862	15
		Associations (local, of private owners)	1.5873	15.0794	19.8413	63.4921	0	4.8	7.73333	1.06667	23.7333	16.2667	22.9333	3.2	20.2667	63
		Associations (national/regional, of land owners)	0	0	0	100	0	0	5.17241	12.069	8.62069	6.89655	32.7586	12.069	22.4138	10
		Industry (forest, energy/utilities)	16.6667	16.6667	0	66.6667	0	8.33333	26.3889	8.33333	11.1111	22.2222	12.5	4.16667	6.94444	12
		SMEs (technical/forest services, trade)	5.12821	15.3846	10.2564	69.2308	0	8.97436	8.54701	2.5641	22.2222	8.54701	20.9402	4.70085	23.5043	39
		(Collective) Private forest owners	0	9.61538	1.92308	88.4615	0	8.91089	6.93069	2.64026	21.1221	9.57096	21.1221	4.62046	25.0825	50
		Research institutions	0	0	0	100	0	0	0	0	16.6667	0	83.3333	0	0	2
	all	Government actors	13.6878	42.8732	3.94001	39.1309	0.368098	12.0515	12.6617	8.71092	14.5418	7.87037	19.9976	8.41991	15.7462	185.333
		Non-government actors	11.7629	18.6282	8.17112	61.4377	0	10.8644	8.45541	6.66626	16.7371	6.92193	16.286	9.80837	24.2606	294.5
Table S2	Primary facilitators and instruments: roundwood commercialisation from private forests 1.
			Thematic issue: Roundwood commercialisation from private forests
	region	actor type	main facilitators					most appropriate instruments								N
			State (Ministry)	Market (private economy)	Society (unions, associations, citizens´ initiatives)	individual citizens / forest owners	leave it to nature	laws (dictates, bans)	standards/norms	taxes / duties	positive financial incentives (subsidies, financing)	awareness raising, public relations	advice and training	exchange offers, contracts by private law	liberal formation of prices (supply, demand)
	SPAIN (Castilla y León)	Government actors	11.1111	33.3333	0	55.5556	0	18.8679	18.8679	0	0	3.77358	5.66038	32.0755	20.7547	9				>=20
		Associations (industry, energy)	50	0	0	50	0	25	0	0	0	0	0	25	50	2				>=30
		Associations (biomass producers)	0	100	0	0	0	33.3333	0	0	0	0	33.3333	0	33.3333	1				>=50
		Associations (national/local, of private owners)	0	66.6667	0	33.3333	0	0	22.2222	11.1111	33.3333	0	16.6667	11.1111	5.55556	3				>=70
		Associations (professional/foresters' societies)	100	0	0	0	0	33.3333	0	0	16.6667	0	0	0	50	1
		Industry (forest, energy/utilities)	0	0	0	100	0	0	16.6667	0	0	0	0	41.6667	41.6667	4
		SMEs (technical/forest services, trade)	0	0	0	100	0	0	16.6667	0	0	0	0	41.6667	41.6667	2
		Private forest owners	0	0	0	100	0	0	33.3333	0	0	0	16.6667	33.3333	16.6667	1
		Research institutions	0	0	0	100	0	0	25	0	0	0	16.6667	25	33.3333	2
	PT, N-E	Government actors	0	100	0	0	0	5.55556	5.55556	16.6667	0	0	5.55556	22.2222	44.4444	3
		Associations (national/local, of private owners)	14.2857	14.2857	28.5714	42.8571	0	2.38095	7.14286	2.38095	2.38095	0	7.14286	30.9524	47.619	7
		SMEs (technical/forest services, trade)	0	0	0	100	0	0	16.6667	33.3333	0	0	0	0	50	1
	LATVIA	Government actors	0	33.3333	0	66.6667	0	0	0	16.6667	5.55556	11.1111	22.2222	0	44.4444	3
		Associations (industry, energy)	0	100	0	0	0	0	0	44.4444	11.1111	0	0	0	44.4444	4
		Associations (biomass producers)	100	0	0	0	0	33.3333	0	0	16.6667	50	0	0	0	1
		Industry (forest, energy/utilities, pellet)	20	60	0	20	0	23.3333	0	11.6667	18.3333	5	3.33333	6.66667	31.6667	11
		SMEs (technical/forest services, trade)	11.1111	77.7778	0	11.1111	0	24.0741	0	12.963	29.6296	0	0	3.7037	29.6296	10
		Private forest owners (industrial)	0	100	0	0	0	0	0	0	0	33.3333	0	33.3333	33.3333	1
		Research institutions	0	100	0	0	0	27.7778	5.55556	0	22.2222	0	11.1111	0	33.3333	3
	SLOVENIA	Government actors	0	25	0	75	0	0	10.4167	16.6667	10.4167	12.5	14.5833	12.5	22.9167	9.33333
		Associations (national/local, of private owners)	3.57143	28.5714	14.2857	53.5714	0	4.93827	7.40741	7.40741	16.0494	2.46914	17.9012	4.32099	39.5062	33.8333
		Industry (forest, energy/utilities)	0	100	0	0	0	100	0	0	0	0	0	0	0	1.16667
		SMEs (technical/forest services, trade)	0	0	0	100	0	0	8.33333	0	0	0	41.6667	0	50	2.33333
		Research institutions	0	0	0	100	0	0	50	0	0	0	33.3333	0	16.6667	1.16667
	GERMANY (Bavaria)	Government actors	3.65854	35.3659	28.6585	31.0976	1.21951	2.54777	13.2696	3.7155	15.4989	10.828	23.9915	3.7155	26.4331	161
		Associations (tourism and nature conservation)	0	54.5455	45.4545	0	0	3.0303	18.1818	6.06061	13.6364	4.54545	37.8788	0	16.6667	11
		Associations (hunting, local/national)	0	17.6471	11.7647	70.5882	0	3.44828	9.1954	5.74713	8.04598	6.89655	13.7931	12.6437	40.2299	15
		Associations (local, of private owners)	0	22.2222	52.381	25.3968	0	2.13904	14.1711	4.0107	16.0428	9.35829	16.8449	5.34759	32.0856	63
		Associations (national/regional, of land owners)	0	40	10	50	0	0	6.77966	3.38983	13.5593	1.69492	13.5593	10.1695	50.8475	10
		Industry (forest, energy/utilities)	0	33.3333	50	16.6667	0	1.49254	8.95522	1.49254	10.4478	23.8806	14.9254	0	38.806	12
		SMEs (technical/forest services, trade)	2.5641	28.2051	20.5128	48.7179	0	4.2735	5.12821	5.98291	10.6838	8.97436	18.3761	8.54701	38.0342	39
		(Collective) Private forest owners	1.96078	25.4902	33.3333	39.2157	0	2.73973	4.79452	4.10959	11.3014	9.58904	15.7534	11.9863	39.726	50
		Research institutions	0	50	0	50	0	0	0	0	25	8.33333	66.6667	0	0	2
	all	Government actors	2.95393	45.4065	5.73171	45.664	0.243902	5.39425	9.62196	10.7431	6.29423	7.64254	14.4026	14.1026	31.7987	185.333
		Non-government actors	8.78308	32.1532	14.5244	44.5393	0	8.11527	8.46595	6.56305	11.4207	3.28174	10.8919	13.9103	37.3511	294.5
Table S3	Primary facilitators and instruments: roundwood production and energy transition 1.
			Thematic issue: Roundwood production and energy transition
	region	actor type	main facilitators					most appropriate instruments								N
			State (Ministry)	Market (private economy)	Society (unions, associations, citizens´ initiatives)	individual citizens / forest owners	leave it to nature	laws (dictates, bans)	standards/norms	taxes / duties	positive financial incentives (subsidies, financing)	awareness raising, public relations	advice and training	exchange offers, contracts by private law	liberal formation of prices (supply, demand)
	SPAIN (Castilla y León)	Government actors	44.4444	33.3333	0	22.2222	0	20.3704	18.5185	9.25926	1.85185	7.40741	3.7037	27.7778	11.1111	9				>=20
		Associations (industry, energy)	50	0	0	50	0	25	0	0	0	0	0	25	50	2				>=30
		Associations (biomass producers)	0	100	0	0	0	33.3333	0	0	0	33.3333	33.3333	0	0	1				>=50
		Associations (national/local, of private owners)	33.3333	33.3333	33.3333	0	0	11.1111	5.55556	5.55556	27.7778	5.55556	16.6667	16.6667	11.1111	3				>=70
		Associations (professional/foresters' societies)	100	0	0	0	0	33.3333	0	0	16.6667	0	0	0	50	1
		Industry (forest, energy/utilities)	0	0	0	100	0	0	8.33333	0	0	0	0	45.8333	45.8333	4
		SMEs (technical/forest services, trade)	0	0	0	100	0	0	33.3333	0	0	33.3333	0	33.3333	0	2
		Private forest owners	100	0	0	0	0	33.3333	0	33.3333	16.6667	0	16.6667	0	0	1
		Research institutions	0	100	0	0	0	0	0	0	8.33333	16.6667	0	50	25	2
	PT, N-E	Government actors	50	50	0	0	0	33.3333	25	0	8.33333	0	16.6667	0	16.6667	3
		Associations (national/local, of private owners)	0	42.8571	0	57.1429	0	21.4286	2.38095	2.38095	4.7619	0	2.38095	26.1905	40.4762	7
		SMEs (technical/forest services, trade)	0	100	0	0	0	16.6667	0	0	0	0	0	33.3333	50	1
	LATVIA	Government actors	33.3333	66.6667	0	0	0	15.7895	0	31.5789	15.7895	0	15.7895	0	21.0526	3
		Associations (industry, energy)	33.3333	66.6667	0	0	0	38.8889	5.55556	11.1111	22.2222	5.55556	0	0	16.6667	4
		Associations (biomass producers)	-	-	-	-	-	-	-	-	-	-	-	-	-	1
		Industry (forest, energy/utilities, pellet)	70	30	0	0	0	24.0741	0	7.40741	27.7778	9.25926	0	0	31.4815	11
		SMEs (technical/forest services, trade)	33.3333	66.6667	0	0	0	33.3333	0	0	33.3333	5.55556	16.6667	0	11.1111	10
		Private forest owners (industrial)	0	100	0	0	0	0	0	0	50	0	0	0	50	1
		Research institutions	0	100	0	0	0	11.1111	11.1111	22.2222	22.2222	0	0	0	33.3333	3
	SLOVENIA	Government actors	37.5	25	12.5	25	0	0	4.16667	22.9167	35.4167	25	4.16667	4.16667	4.16667	9.33333
		Associations (national/local, of private owners)	25	39.2857	10.7143	25	0	16.0494	13.5802	11.1111	21.6049	6.17284	11.7284	4.93827	14.8148	33.8333
		Industry (forest, energy/utilities)	100	0	0	0	0	0	0	0	33.3333	33.3333	33.3333	0	0	1.16667
		SMEs (technical/forest services, trade)	0	0	0	100	0	0	16.6667	0	0	25	8.33333	0	50	2.33333
		Research institutions	0	0	100	0	0	0	16.6667	0	50	33.3333	0	0	0	1.16667
	GERMANY (Bavaria)	Government actors	40.7186	34.1317	6.58683	16.7665	1.79641	14.21	8.48356	6.04454	22.4814	20.1485	16.649	1.48462	10.4984	161
		Associations (tourism and nature conservation)	81.8182	0	18.1818	0	0	18.1818	0	3.0303	7.57576	40.9091	28.7879	1.51515	0	11
		Associations (hunting, local/national)	17.6471	23.5294	0	58.8235	0	8.04598	4.5977	3.44828	45.977	17.2414	2.29885	3.44828	14.9425	15
		Associations (local, of private owners)	12.6984	38.0952	26.9841	22.2222	0	8.20106	15.0794	5.55556	24.3386	18.254	8.46561	2.91005	17.1958	63
		Associations (national/regional, of land owners)	60	30	10	0	0	13.7931	3.44828	3.44828	22.4138	24.1379	13.7931	5.17241	13.7931	10
		Industry (forest, energy/utilities)	33.3333	33.3333	16.6667	16.6667	0	11.4286	1.42857	4.28571	20	18.5714	10	2.85714	31.4286	12
		SMEs (technical/forest services, trade)	17.9487	43.5897	12.8205	25.641	0	7.65766	17.5676	0	17.5676	16.6667	9.90991	4.5045	26.1261	39
		(Collective) Private forest owners	19.2308	30.7692	9.61538	40.3846	0	10.8475	6.77966	5.76271	15.2542	17.2881	11.5254	4.74576	27.7966	50
		Research institutions	50	0	50	0	0	0	0	0	50	16.6667	33.3333	0	0	2
	all	Government actors	41.1993	41.8263	3.81737	12.7977	0.359281	16.7406	11.2337	13.9599	16.7746	10.5112	11.3951	6.68581	12.6991	185.333
		Non-government actors	24.1339	39.0033	6.95388	29.909	0	16.4857	6.66761	5.35071	16.9026	8.55523	6.8419	12.5732	26.6231	294.5
Table S4	Primary facilitators and instruments: (new) areas of application for wood 1.
			Thematic issue: (New) areas of application for wood
	region	actor type	main facilitators					most appropriate instruments								N
			State (Ministry)	Market (private economy)	Society (unions, associations, citizens´ initiatives)	individual citizens / forest owners	leave it to nature	laws (dictates, bans)	standards/norms	taxes / duties	positive financial incentives (subsidies, financing)	awareness raising, public relations	advice and training	exchange offers, contracts by private law	liberal formation of prices (supply, demand)
	SPAIN (Castilla y León)	Government actors	22.2222	55.5556	22.2222	0	0	9.25926	25.9259	0	14.8148	1.85185	14.8148	24.0741	9.25926	9				>=20
		Associations (industry, energy)	50	50	0	0	0	25	25	0	25	0	0	25	0	2				>=30
		Associations (biomass producers)	0	100	0	0	0	0	0	0	16.6667	16.6667	33.3333	0	33.3333	1				>=50
		Associations (national/local, of private owners)	0	66.6667	0	0	33.3333	0	16.6667	0	33.3333	0	27.7778	0	22.2222	3				>=70
		Associations (professional/foresters' societies)	100	0	0	0	0	50	0	0	0	33.3333	16.6667	0	0	1
		Industry (forest, energy/utilities)	75	25	0	0	0	29.1667	29.1667	0	16.6667	0	0	12.5	12.5	4
		SMEs (technical/forest services, trade)	100	0	0	0	0	0	33.3333	0	33.3333	0	33.3333	0	0	2
		Private forest owners	100	0	0	0	0	16.6667	0	0	16.6667	16.6667	50	0	0	1
		Research institutions	0	100	0	0	0	0	41.6667	0	33.3333	0	0	25	0	2
	PT, N-E	Government actors	66.6667	0	33.3333	0	0	16.6667	16.6667	0	11.1111	11.1111	11.1111	0	33.3333	3
		Associations (national/local, of private owners)	14.2857	71.4286	0	14.2857	0	4.7619	2.38095	0	16.6667	0	23.8095	16.6667	35.7143	7
		SMEs (technical/forest services, trade)	0	0	100	0	0	0	0	50	0	0	16.6667	0	33.3333	1
	LATVIA	Government actors	0	33.3333	66.6667	0	0	11.1111	0	11.1111	11.1111	22.2222	22.2222	0	22.2222	3
		Associations (industry, energy)	100	0	0	0	0	25	0	25	25	25	0	0	0	4
		Associations (biomass producers)	-	-	-	-	-	-	-	-	-	-	-	-	-	1
		Industry (forest, energy/utilities, pellet)	50	25	0	0	25	11.1111	0	22.2222	11.1111	5.55556	0	16.6667	33.3333	11
		SMEs (technical/forest services, trade)	100	0	0	0	0	50	0	0	33.3333	0	0	0	16.6667	10
		Private forest owners (industrial)	0	100	0	0	0	0	0	0	33.3333	33.3333	0	0	33.3333	1
		Research institutions	0	100	0	0	0	0	0	33.3333	50	16.6667	0	0	0	3
	SLOVENIA	Government actors	0	87.5	12.5	0	0	6.25	4.16667	10.4167	27.0833	22.9167	22.9167	4.16667	2.08333	9.33333
		Associations (national/local, of private owners)	21.4286	60.7143	7.14286	10.7143	0	15.4321	6.79012	10.4938	19.1358	11.7284	15.4321	3.7037	17.284	33.8333
		Industry (forest, energy/utilities)	0	100	0	0	0	0	33.3333	0	33.3333	33.3333	0	0	0	1.16667
		SMEs (technical/forest services, trade)	50	0	0	50	0	0	8.33333	0	25	41.6667	25	0	0	2.33333
		Research institutions	0	0	100	0	0	0	16.6667	0	50	33.3333	0	0	0	1.16667
	GERMANY (Bavaria)	Government actors	16.3636	63.6364	12.7273	4.24242	3.0303	2.90948	14.1164	3.55603	18.4267	26.1853	17.4569	1.50862	15.8405	161
		Associations (tourism and nature conservation)	9.09091	81.8182	9.09091	0	0	10	0	0	13.3333	18.3333	33.3333	0	25	11
		Associations (hunting, local/national)	12.5	37.5	25	25	0	1.13636	0	3.40909	25	15.9091	17.0455	3.40909	34.0909	15
		Associations (local, of private owners)	6.34921	74.6032	15.873	3.1746	0	1.85185	9.78836	4.7619	23.545	24.6032	16.4021	0.529101	18.5185	63
		Associations (national/regional, of land owners)	20	50	20	0	10	1.66667	0	11.6667	33.3333	21.6667	15	1.66667	15	10
		Industry (forest, energy/utilities)	25	66.6667	8.33333	0	0	7.04225	2.8169	2.8169	9.85915	21.1268	12.6761	1.40845	42.2535	12
		SMEs (technical/forest services, trade)	5.40541	64.8649	16.2162	13.5135	0	5.85586	18.4685	0	15.7658	18.018	11.2613	5.85586	24.7748	39
		(Collective) Private forest owners	12	50	24	14	0	3.52113	4.22535	2.8169	25.7042	20.7746	17.2535	5.6338	20.0704	50
		Research institutions	0	100	0	0	0	0	0	0	25	25	0	0	50	2
	all	Government actors	21.0505	48.0051	29.4899	0.848485	0.606061	9.2393	12.1751	5.01676	16.5094	16.8574	17.7043	5.94987	16.5477	185.333
		Non-government actors	29.9762	51.704	7.95709	6.79104	3.57172	10.5034	8.17886	7.47477	21.2763	10.982	13.9361	7.29959	20.3489	294.5
Table S5	Primary facilitators and instruments: role of ecosystem services of forests 1.
			Thematic issue: Role of ecosystem services (water, air, carbon) of forests
	region	actor type	main facilitators					most appropriate instruments								N
			State (Ministry)	Market (private economy)	Society (unions, associations, citizens´ initiatives)	individual citizens / forest owners	leave it to nature	laws (dictates, bans)	standards/norms	taxes / duties	positive financial incentives (subsidies, financing)	awareness raising, public relations	advice and training	exchange offers, contracts by private law	liberal formation of prices (supply, demand)
	SPAIN (Castilla y León)	Government actors	55.5556	0	22.2222	11.1111	11.1111	14.8148	24.0741	1.85185	11.1111	20.3704	24.0741	3.7037	0	9				>=20
		Associations (industry, energy)	100	0	0	0	0	50	25	0	0	25	0	0	0	2				>=30
		Associations (biomass producers)	-	-	-	-	-	33.3333	0	33.3333	33.3333	0	0	0	0	1				>=50
		Associations (national/local, of private owners)	66.6667	0	33.3333	0	0	11.1111	33.3333	0	33.3333	22.2222	0	0	0	3				>=70
		Associations (professional/foresters' societies)	100	0	0	0	0	50	0	16.6667	0	33.3333	0	0	0	1
		Industry (forest, energy/utilities)	100	0	0	0	0	41.6667	41.6667	0	0	8.33333	8.33333	0	0	4
		SMEs (technical/forest services, trade)	100	0	0	0	0	0	33.3333	0	16.6667	33.3333	16.6667	0	0	2
		Private forest owners	100	0	0	0	0	33.3333	0	0	33.3333	16.6667	16.6667	0	0	1
		Research institutions	50	0	50	0	0	0	8.33333	0	50	25	16.6667	0	0	2
	PT, N-E	Government actors	66.6667	33.3333	0	0	0	27.7778	22.2222	0	16.6667	27.7778	5.55556	0	0	3
		Associations (national/local, of private owners)	75	0	0	12.5	12.5	21.4286	14.2857	16.6667	19.0476	7.14286	16.6667	4.7619	0	7
		SMEs (technical/forest services, trade)	0	100	0	0	0	16.6667	33.3333	50	0	0	0	0	0	1
	LATVIA	Government actors	100	0	0	0	0	38.8889	5.55556	5.55556	16.6667	11.1111	22.2222	0	0	3
		Associations (industry, energy)	33.3333	0	33.3333	33.3333	0	50	5.55556	5.55556	11.1111	22.2222	5.55556	0	0	4
		Associations (biomass producers)	-	-	-	-	-	-	-	-	-	-	-	-	-	1
		Industry (forest, energy/utilities, pellet)	11.1111	0	22.2222	11.1111	55.5556	40.7407	1.85185	3.7037	0	27.7778	22.2222	3.7037	0	11
		SMEs (technical/forest services, trade)	0	0	0	0	100	0	0	0	0	50	33.3333	16.6667	0	10
		Private forest owners (industrial)	100	0	0	0	0	0	0	0	50	0	50	0	0	1
		Research institutions	33.3333	0	33.3333	0	33.3333	22.2222	0	16.6667	0	33.3333	22.2222	5.55556	0	3
	SLOVENIA	Government actors	50	0	25	12.5	12.5	33.3333	8.33333	12.5	25	16.6667	4.16667	0	0	9.33333
		Associations (national/local, of private owners)	67.8571	0	14.2857	7.14286	10.7143	46	4	8.66667	15.3333	18.6667	7.33333	0	0	33.8333
		Industry (forest, energy/utilities)	100	0	0	0	0	0	100	0	0	0	0	0	0	1.16667
		SMEs (technical/forest services, trade)	0	0	100	0	0	16.6667	16.6667	0	25	16.6667	25	0	0	2.33333
		Research institutions	0	0	100	0	0	16.6667	0	0	0	50	33.3333	0	0	1.16667
	GERMANY (Bavaria)	Government actors	62.4242	2.42424	17.5758	6.06061	11.5152	24.1489	10.5319	2.76596	20.1064	26.1702	14.0426	0.744681	1.48936	161
		Associations (tourism and nature conservation)	81.8182	0	18.1818	0	0	33.3333	0	0	3.0303	40.9091	22.7273	0	0	11
		Associations (hunting, local/national)	76.9231	0	0	7.69231	15.3846	44.8718	17.9487	7.69231	6.41026	10.2564	6.41026	0	6.41026	15
		Associations (local, of private owners)	62.2951	0	14.7541	11.4754	11.4754	20.0557	16.9916	2.50696	20.0557	27.5766	9.47075	2.50696	0.835655	63
		Associations (national/regional, of land owners)	70	10	10	0	10	28.5714	3.57143	3.57143	30.3571	16.0714	8.92857	3.57143	5.35714	10
		Industry (forest, energy/utilities)	66.6667	0	25	8.33333	0	28.169	28.169	0	14.0845	12.6761	12.6761	4.22535	0	12
		SMEs (technical/forest services, trade)	66.6667	2.5641	7.69231	15.3846	7.69231	28.6364	14.5455	3.18182	24.5455	11.3636	7.72727	3.63636	6.36364	39
		(Collective) Private forest owners	65.9574	0	4.25532	14.8936	14.8936	29.6296	11.4815	1.48148	16.2963	24.4444	10.7407	0.740741	5.18519	50
		Research institutions	50	0	50	0	0	16.6667	16.6667	0	0	66.6667	0	0	0	2
	all	Government actors	66.9293	7.15152	12.9596	5.93434	7.02525	27.7928	14.1434	4.53467	17.9102	20.4192	14.0122	0.889677	0.297872	185.333
		Non-government actors	61.2059	2.42735	13.9014	8.08157	14.3838	29.9906	13.1969	7.95709	14.6565	18.9263	12.5419	2.04168	0.689046	294.5
Table S6	Primary facilitators and instruments: adaptation of forests to climate change 1.
			Thematic issue: Adaption of forests to climate change
	region	actor type	main facilitators					most appropriate instruments								N
			State (Ministry)	Market (private economy)	Society (unions, associations, citizens´ initiatives)	individual citizens / forest owners	leave it to nature	laws (dictates, bans)	standards/norms	taxes / duties	positive financial incentives (subsidies, financing)	awareness raising, public relations	advice and training	exchange offers, contracts by private law	liberal formation of prices (supply, demand)
	SPAIN (Castilla y León)	Government actors	88.8889	0	11.1111	0	0	25.9259	25.9259	1.85185	7.40741	22.2222	12.963	3.7037	0	9				>=20
		Associations (industry, energy)	100	0	0	0	0	50	25	0	0	25	0	0	0	2				>=30
		Associations (biomass producers)	100	0	0	0	0	33.3333	0	0	33.3333	0	33.3333	0	0	1				>=50
		Associations (national/local, of private owners)	33.3333	0	33.3333	0	33.3333	0	50	0	22.2222	11.1111	16.6667	0	0	3				>=70
		Associations (professional/foresters' societies)	100	0	0	0	0	33.3333	50	0	0	16.6667	0	0	0	1
		Industry (forest, energy/utilities)	100	0	0	0	0	37.5	37.5	0	0	16.6667	8.33333	0	0	4
		SMEs (technical/forest services, trade)	100	0	0	0	0	16.6667	33.3333	0	0	33.3333	16.6667	0	0	2
		Private forest owners	100	0	0	0	0	16.6667	0	0	50	33.3333	0	0	0	1
		Research institutions	100	0	0	0	0	0	0	0	50	16.6667	33.3333	0	0	2
	PT, N-E	Government actors	66.6667	0	33.3333	0	0	22.2222	33.3333	5.55556	0	22.2222	16.6667	0	0	3
		Associations (national/local, of private owners)	57.1429	0	0	28.5714	14.2857	11.9048	9.52381	7.14286	21.4286	14.2857	35.7143	0	0	7
		SMEs (technical/forest services, trade)	0	0	0	0	100	50	0	0	33.3333	0	16.6667	0	0	1
	LATVIA	Government actors	66.6667	0	0	0	33.3333	27.7778	0	27.7778	16.6667	22.2222	5.55556	0	0	3
		Associations (industry, energy)	50	0	0	0	50	25	0	25	0	16.6667	8.33333	25	0	4
		Associations (biomass producers)	-	-	-	-	-	-	-	-	-	-	-	-	-	1
		Industry (forest, energy/utilities, pellet)	25	0	0	0	75	25	6.25	0	6.25	31.25	29.1667	2.08333	0	11
		SMEs (technical/forest services, trade)	0	0	0	0	100	25	0	16.6667	0	50	8.33333	0	0	10
		Private forest owners (industrial)	100	0	0	0	0	33.3333	0	0	33.3333	0	33.3333	0	0	1
		Research institutions	100	0	0	0	0	0	0	0	16.6667	50	33.3333	0	0	3
	SLOVENIA	Government actors	50	0	25	0	25	30.5556	2.77778	5.55556	8.33333	36.1111	11.1111	0	5.55556	9.33333
		Associations (national/local, of private owners)	21.4286	3.57143	14.2857	7.14286	53.5714	25.4902	8.82353	2.94118	13.7255	20.5882	26.4706	1.96078	0	33.8333
		Industry (forest, energy/utilities)	0	0	100	0	0	0	0	0	33.3333	33.3333	33.3333	0	0	1.16667
		SMEs (technical/forest services, trade)	0	0	0	0	100	-	-	-	-	-	-	-	-	2.33333
		Research institutions	0	0	100	0	0	33.3333	0	0	0	50	16.6667	0	0	1.16667
	GERMANY (Bavaria)	Government actors	52.4691	1.23457	4.93827	28.3951	12.963	12.1406	5.7508	1.17146	31.4164	23.5357	25.3461	0.425985	0.212993	161
		Associations (tourism and nature conservation)	90.9091	0	0	0	9.09091	28.7879	0	0	12.1212	22.7273	33.3333	3.0303	0	11
		Associations (hunting, local/national)	5.88235	5.88235	11.7647	47.0588	29.4118	12.3457	0	0	33.3333	33.3333	18.5185	0	2.46914	15
		Associations (local, of private owners)	41.2698	0	7.93651	42.8571	7.93651	3.47594	8.55615	0.26738	36.8984	22.4599	25.9358	1.87166	0.534759	63
		Associations (national/regional, of land owners)	40	0	10	40	10	11.8644	6.77966	0	23.7288	20.339	27.1186	0	10.1695	10
		Industry (forest, energy/utilities)	41.6667	25	8.33333	8.33333	16.6667	5.71429	21.4286	2.85714	15.7143	31.4286	20	2.85714	0	12
		SMEs (technical/forest services, trade)	41.0256	2.5641	7.69231	43.5897	5.12821	11.1607	8.92857	2.67857	34.8214	17.4107	21.4286	0	3.57143	39
		(Collective) Private forest owners	28.8462	0	7.69231	51.9231	11.5385	11.9298	5.61404	0.701754	24.2105	24.9123	23.1579	0	9.47368	50
		Research institutions	50	0	50	0	0	25	0	0	0	16.6667	58.3333	0	0	2
	all	Government actors	64.9383	0.246914	14.8765	5.67901	14.2593	23.7244	13.5576	8.38244	12.7648	25.2627	14.3285	0.825938	1.15371	185.333
		Non-government actors	45.9657	1.11044	6.65049	14.4053	31.8681	19.8605	11.668	3.15467	17.378	21.6753	24.0038	1.49113	0.768574	294.5
Table S7	Primary facilitators and instruments: nature conservation on private forest land 1.
			Thematic issue: Nature conservation on private forest land 1
	region	actor type	main facilitators					most appropriate instruments								N
			State (Ministry)	Market (private economy)	Society (unions, associations, citizens´ initiatives)	individual citizens / forest owners	leave it to nature	laws (dictates, bans)	standards/norms	taxes / duties	positive financial incentives (subsidies, financing)	awareness raising, public relations	advice and training	exchange offers, contracts by private law	liberal formation of prices (supply, demand)
	SPAIN (Castilla y León)	Government actors	33.3333	0	11.1111	44.4444	11.1111	27.7778	25.9259	5.55556	12.963	9.25926	18.5185	0	0	9
		Associations (industry, energy)	100	0	0	0	0	50	25	0	0	25	0	0	0	2
		Associations (biomass producers)	100	0	0	0	0	50	0	0	33.3333	0	16.6667	0	0	1
		Associations (national/local, of private owners)	0	33.3333	33.3333	33.3333	0	0	27.7778	0	50	0	22.2222	0	0	3
		Associations (professional/foresters' societies)	100	0	0	0	0	16.6667	0	0	50	33.3333	0	0	0	1
		Industry (forest, energy/utilities)	100	0	0	0	0	41.6667	41.6667	0	0	8.33333	8.33333	0	0	4
		SMEs (technical/forest services, trade)	100	0	0	0	0	0	33.3333	0	0	33.3333	33.3333	0	0	2
		Private forest owners	0	0	0	100	0	0	16.6667	0	33.3333	33.3333	16.6667	0	0	1
		Research institutions	50	0	0	50	0	16.6667	8.33333	0	25	0	50	0	0	2
	PT, N-E	Government actors	33.3333	0	33.3333	33.3333	0	27.7778	16.6667	0	11.1111	22.2222	22.2222	0	0	3
		Associations (national/local, of private owners)	57.1429	0	42.8571	0	0	19.0476	7.14286	7.14286	35.7143	7.14286	19.0476	4.7619	0	7
		SMEs (technical/forest services, trade)	0	0	0	100	0	50	0	0	33.3333	0	16.6667	0	0	1
	LATVIA	Government actors	66.6667	0	33.3333	0	0	38.8889	5.55556	16.6667	22.2222	11.1111	5.55556	0	0	3
		Associations (industry, energy)	33.3333	0	0	66.6667	0	27.7778	5.55556	33.3333	27.7778	5.55556	0	0	0	4
		Associations (biomass producers)	0	0	100	0	0	50	0	0	0	16.6667	33.3333	0	0	1
		Industry (forest, energy/utilities, pellet)	33.3333	0	11.1111	55.5556	0	34.6154	3.84615	9.61538	21.1538	23.0769	7.69231	0	0	11
		SMEs (technical/forest services, trade)	0	0	0	100	0	33.3333	0	16.6667	16.6667	22.2222	11.1111	0	0	10
		Private forest owners (industrial)	0	100	0	0	0	0	0	0	33.3333	33.3333	33.3333	0	0	1
		Research institutions	33.3333	0	0	66.6667	0	38.8889	0	0	11.1111	33.3333	16.6667	0	0	3
	SLOVENIA	Government actors	37.5	0	50	0	12.5	27.0833	4.16667	6.25	8.33333	31.25	22.9167	0	0	9.33333
		Associations (national/local, of private owners)	60.7143	0	25	10.7143	3.57143	37.8205	6.41026	6.41026	10.8974	30.7692	7.69231	0	0	33.8333
		Industry (forest, energy/utilities)	0	0	100	0	0	0	0	0	33.3333	33.3333	33.3333	0	0	1.16667
		SMEs (technical/forest services, trade)	0	0	50	50	0	0	0	0	16.6667	16.6667	66.6667	0	0	2.33333
		Research institutions	100	0	0	0	0	50	0	0	16.6667	33.3333	0	0	0	1.16667
	GERMANY (Bavaria)	Government actors	44.1718	1.84049	9.20245	42.3313	2.45399	20.3057	7.31441	1.20087	29.1485	17.5764	21.5066	2.18341	0.764192	161
		Associations (tourism and nature conservation)	81.8182	0	0	18.1818	0	24.2424	0	0	21.2121	16.6667	33.3333	4.54545	0	11
		Associations (hunting, local/national)	28.5714	7.14286	0	50	14.2857	21.5909	9.09091	0	18.1818	38.6364	12.5	0	0	15
		Associations (local, of private owners)	12.9032	3.22581	19.3548	62.9032	1.6129	9.18919	9.45946	0	32.973	22.973	22.7027	2.16216	0.540541	63
		Associations (national/regional, of land owners)	30	0	10	60	0	13.3333	11.6667	0	30	21.6667	18.3333	3.33333	1.66667	10
		Industry (forest, energy/utilities)	41.6667	0	0	41.6667	16.6667	26.087	8.69565	2.89855	21.7391	31.8841	5.7971	2.89855	0	12
		SMEs (technical/forest services, trade)	30.7692	2.5641	7.69231	56.4103	2.5641	17.5676	18.018	0	24.3243	15.7658	19.3694	0	4.95495	39
		(Collective) Private forest owners	34	2	2	52	10	15.7895	5.26316	0.701754	21.0526	28.0702	21.0526	2.10526	5.96491	50
		Research institutions	50	0	0	50	0	66.6667	16.6667	0	0	0	16.6667	0	0	2
	all	Government actors	43.001	0.368098	27.396	24.0218	5.21302	28.3667	11.9258	5.93462	16.7556	18.2838	18.1439	0.436681	0.152838	185.333
		Non-government actors	45.9	2.75	18.075	31.55	1.725	25.8569	9.79791	4.80225	22.4868	19.1433	16.1922	1.1917	0.52901	294.5
		1 for Slovenia: nature conservation in general.
Table S8	Primary facilitators and instruments: challenges to the provision of soil or infrastructure protection by private forests 1.
			Thematic issue: Challenges, caused by climate change, to the provision of protection of soil or infrastructure by private forests 1
	region	actor type	main facilitators					most appropriate instruments								N
			State (Ministry)	Market (private economy)	Society (unions, associations, citizens´ initiatives)	individual citizens / forest owners	leave it to nature	laws (dictates, bans)	standards/norms	taxes / duties	positive financial incentives (subsidies, financing)	awareness raising, public relations	advice and training	exchange offers, contracts by private law	liberal formation of prices (supply, demand)
	SPAIN (Castilla y León)	Government actors	88.8889	0	11.1111	0	0	33.3333	31.4815	5.55556	1.85185	11.1111	12.963	3.7037	0	9
		Associations (industry, energy)	100	0	0	0	0	50	25	0	0	25	0	0	0	2
		Associations (biomass producers)	-	-	-	-	-	16.6667	0	0	50	16.6667	16.6667	0	0	1
		Associations (national/local, of private owners)	66.6667	33.3333	0	0	0	11.1111	11.1111	0	38.8889	0	27.7778	0	11.1111	3
		Associations (professional/foresters' societies)	100	0	0	0	0	16.6667	0	0	50	33.3333	0	0	0	1
		Industry (forest, energy/utilities)	100	0	0	0	0	37.5	37.5	0	0	25	0	0	0	4
		SMEs (technical/forest services, trade)	100	0	0	0	0	16.6667	33.3333	0	16.6667	16.6667	16.6667	0	0	2
		Private forest owners	100	0	0	0	0	33.3333	0	0	33.3333	0	33.3333	0	0	1
		Research institutions	100	0	0	0	0	33.3333	50	16.6667	0	0	0	0	0	2
	PT, N-E	Government actors	66.6667	0	33.3333	0	0	11.1111	38.8889	0	0	33.3333	16.6667	0	0	3
		Associations (national/local, of private owners)	85.7143	0	14.2857	0	0	23.8095	4.7619	7.14286	21.4286	19.0476	19.0476	4.7619	0	7
		SMEs (technical/forest services, trade)	100	0	0	0	0	0	16.6667	0	0	33.3333	50	0	0	1
	LATVIA	Government actors	0	33.3333	33.3333	33.3333	0	33.3333	0	22.2222	5.55556	16.6667	16.6667	5.55556	0	3
		Associations (industry, energy)	100	0	0	0	0	25	0	16.6667	25	8.33333	25	0	0	4
		Associations (biomass producers)	100	0	0	0	0	16.6667	0	0	33.3333	50	0	0	0	1
		Industry (forest, energy/utilities, pellet)	75	0	0	25	0	18.75	0	6.25	22.9167	33.3333	18.75	0	0	11
		SMEs (technical/forest services, trade)	75	0	0	25	0	12.5	0	0	20.8333	29.1667	37.5	0	0	10
		Private forest owners (industrial)	0	0	0	0	100	0	0	0	0	50	50	0	0	1
		Research institutions	33.3333	0	0	66.6667	0	27.7778	0	11.1111	27.7778	33.3333	0	0	0	3
	SLOVENIA	Government actors	56.25	0	6.25	37.5	0	23.9583	3.125	5.20833	36.4583	15.625	14.5833	1.04167	0	9.33333
		Associations (national/local, of private owners)	53.5714	0	0	44.6429	1.78571	21.2963	3.08642	8.33333	35.4938	7.09877	20.3704	1.85185	2.46914	33.8333
		Industry (forest, energy/utilities)	100	0	0	0	0	16.6667	66.6667	0	16.6667	0	0	0	0	1.16667
		SMEs (technical/forest services, trade)	25	0	0	75	0	0	4.16667	8.33333	33.3333	25	25	0	4.16667	2.33333
		Research institutions	0	0	0	100	0	8.33333	0	16.6667	25	16.6667	33.3333	0	0	1.16667
	GERMANY (Bavaria)	Government actors	75	1.21951	7.31707	12.1951	4.26829	25.4797	8.10235	1.0661	23.3475	20.1493	21.0021	0.852878	0	161
		Associations (tourism and nature conservation)	90.9091	0	0	0	9.09091	33.3333	0	3.0303	16.6667	18.1818	27.2727	1.51515	0	11
		Associations (hunting, local/national)	60	6.66667	0	26.6667	6.66667	31.4607	3.37079	0	20.2247	23.5955	13.4831	4.49438	3.37079	15
		Associations (local, of private owners)	50.7937	0	19.0476	26.9841	3.1746	13.6729	17.1582	2.68097	20.6434	22.5201	20.3753	2.68097	0.268097	63
		Associations (national/regional, of land owners)	40	0	0	50	10	25.8621	5.17241	0	18.9655	25.8621	20.6897	3.44828	0	10
		Industry (forest, energy/utilities)	66.6667	0	16.6667	8.33333	8.33333	20.8333	16.6667	0	19.4444	26.3889	13.8889	2.77778	0	12
		SMEs (technical/forest services, trade)	53.8462	2.5641	10.2564	30.7692	2.5641	18.4211	13.1579	0.877193	27.193	20.614	18.8596	0.877193	0	39
		(Collective) Private forest owners	48	0	2	34	16	27.0903	4.68227	1.33779	21.0702	18.0602	19.398	3.34448	5.01672	50
		Research institutions	100	0	0	0	0	50	0	0	0	16.6667	33.3333	0	0	2
	all	Government actors	57.3611	6.91057	18.269	16.6057	0.853659	25.4432	16.3195	6.81044	13.4427	19.3771	16.3764	2.23076	0	185.333
		Non-government actors	71.0545	1.53135	4.38119	20.1827	2.85028	21.691	9.37677	4.86216	23.0122	19.3097	18.8563	1.67388	1.218	294.5
		1 for Slovenia: combination of issues "care and protection of forests" and "sanitation"
Table S9	Primary facilitators and instruments: the role of new leisure activities in forests 1.
			Thematic issue: Role of new leisure activities in forests (e.g. mountainbiking, geo-caching) 1
	region	actor type	main facilitators					most appropriate instruments								N
			State (Ministry)	Market (private economy)	Society (unions, associations, citizens´ initiatives)	individual citizens / forest owners	leave it to nature	laws (dictates, bans)	standards/norms	taxes / duties	positive financial incentives (subsidies, financing)	awareness raising, public relations	advice and training	exchange offers, contracts by private law	liberal formation of prices (supply, demand)
	SPAIN (Castilla y León)	Government actors	44.4444	11.1111	33.3333	11.1111	0	14.8148	35.1852	1.85185	0	22.2222	18.5185	3.7037	3.7037	9
		Associations (industry, energy)	100	0	0	0	0	50	25	0	25	0	0	0	0	2
		Associations (biomass producers)	0	0	0	0	100	33.3333	0	0	0	0	33.3333	0	33.3333	1
		Associations (national/local, of private owners)	66.6667	0	0	0	33.3333	5.55556	27.7778	11.1111	0	5.55556	27.7778	16.6667	5.55556	3
		Associations (professional/foresters' societies)	100	0	0	0	0	50	0	0	0	33.3333	16.6667	0	0	1
		Industry (forest, energy/utilities)	75	0	0	25	0	12.5	29.1667	0	8.33333	25	25	0	0	4
		SMEs (technical/forest services, trade)	50	0	0	50	0	41.6667	41.6667	0	0	16.6667	0	0	0	2
		Private forest owners	100	0	0	0	0	0	33.3333	33.3333	0	0	33.3333	0	0	1
		Research institutions	50	0	0	0	50	25	41.6667	8.33333	0	0	25	0	0	2
	PT, N-E	Government actors	33.3333	0	66.6667	0	0	16.6667	16.6667	5.55556	0	44.4444	11.1111	0	5.55556	3
		Associations (national/local, of private owners)	12.5	12.5	62.5	12.5	0	28.5714	4.7619	0	9.52381	16.6667	11.9048	14.2857	14.2857	7
		SMEs (technical/forest services, trade)	0	0	100	0	0	50	16.6667	0	0	0	0	33.3333	0	1
	LATVIA	Government actors	33.3333	0	33.3333	33.3333	0	22.2222	0	0	38.8889	5.55556	16.6667	0	16.6667	3
		Associations (industry, energy)	0	100	0	0	0	16.6667	0	16.6667	16.6667	0	0	0	50	4
		Associations (biomass producers)	-	-	-	-	-	-	-	-	-	-	-	-	-	1
		Industry (forest, energy/utilities, pellet)	40	0	60	0	0	30	6.66667	0	6.66667	40	16.6667	0	0	11
		SMEs (technical/forest services, trade)	-	-	-	-	-	-	-	-	-	-	-	-	-	10
		Private forest owners (industrial)	0	0	100	0	0	0	0	0	0	0	50	0	50	1
		Research institutions	0	100	0	0	0	0	0	0	33.3333	16.6667	0	0	50	3
	SLOVENIA	Government actors	12.5	12.5	50	25	0	16.6667	0	12.5	22.9167	31.25	12.5	0	4.16667	9.33333
		Associations (national/local, of private owners)	28.5714	10.7143	25	35.7143	0	33.3333	6.79012	9.87654	21.6049	14.8148	6.17284	0	7.40741	33.8333
		Industry (forest, energy/utilities)	0	100	0	0	0	33.3333	33.3333	0	0	0	0	0	33.3333	1.16667
		SMEs (technical/forest services, trade)	0	0	0	100	0	16.6667	0	0	25	0	33.3333	0	25	2.33333
		Research institutions	0	0	100	0	0	0	0	0	50	33.3333	16.6667	0	0	1.16667
	GERMANY (Bavaria)	Government actors	46.875	5	33.75	11.25	3.125	30.235	12.8205	2.02991	3.95299	37.8205	8.11966	3.52564	1.49573	161
		Associations (tourism and nature conservation)	9.09091	0	81.8182	9.09091	0	15.1515	1.51515	0	0	53.0303	25.7576	4.54545	0	11
		Associations (hunting, local/national)	50	0	12.5	25	12.5	40.9091	6.81818	5.68182	7.95455	32.9545	5.68182	0	0	15
		Associations (local, of private owners)	34.9206	1.5873	38.0952	25.3968	0	32.2667	13.3333	4.8	7.2	24.2667	4.8	7.73333	5.6	63
		Associations (national/regional, of land owners)	30	0	30	40	0	28.3333	3.33333	6.66667	8.33333	26.6667	6.66667	10	10	10
		Industry (forest, energy/utilities)	30.7692	7.69231	46.1538	15.3846	0	26.4706	11.7647	5.88235	5.88235	30.8824	11.7647	5.88235	1.47059	12
		SMEs (technical/forest services, trade)	58.9744	5.12821	25.641	7.69231	2.5641	35.0877	15.3509	0.438596	2.19298	27.193	5.26316	5.70175	8.77193	39
		(Collective) Private forest owners	50	0	14	36	0	42.4242	10.7744	4.3771	10.101	21.8855	4.3771	4.0404	2.0202	50
		Research institutions	50	0	0	50	0	25	25	0	0	50	0	0	0	2
	all	Government actors	34.0972	5.72222	43.4167	16.1389	0.625	20.1211	12.9345	4.38746	13.1517	28.2585	13.3832	1.44587	6.31766	185.333
		Non-government actors	34.5016	10.1144	34.3137	17.0261	4.04412	28.3293	11.401	3.93253	10.5068	18.8646	12.2777	5.08061	9.60748	294.5
		1 for Slovenia: more general issue: "use of forests for tourism and recreation"
Table S10	Primary facilitators and instruments: population development in rural regions 1.
			Thematic issue: Population development in rural regions
	region	actor type	main facilitators					most appropriate instruments								N
			State (Ministry)	Market (private economy)	Society (unions, associations, citizens´ initiatives)	individual citizens / forest owners	leave it to nature	laws (dictates, bans)	standards/norms	taxes / duties	positive financial incentives (subsidies, financing)	awareness raising, public relations	advice and training	exchange offers, contracts by private law	liberal formation of prices (supply, demand)
	SPAIN (Castilla y León)	Government actors	77.7778	0	11.1111	0	11.1111	12.963	22.2222	3.7037	37.037	11.1111	11.1111	1.85185	0	9
		Associations (industry, energy)	100	0	0	0	0	25	50	0	25	0	0	0	0	2
		Associations (biomass producers)	100	0	0	0	0	50	0	0	0	16.6667	33.3333	0	0	1
		Associations (national/local, of private owners)	66.6667	0	33.3333	0	0	0	0	0	50	27.7778	16.6667	5.55556	0	3
		Associations (professional/foresters' societies)	100	0	0	0	0	50	0	0	16.6667	33.3333	0	0	0	1
		Industry (forest, energy/utilities)	100	0	0	0	0	12.5	41.6667	0	16.6667	29.1667	0	0	0	4
		SMEs (technical/forest services, trade)	50	0	50	0	0	16.6667	25	0	41.6667	16.6667	0	0	0	2
		Private forest owners	100	0	0	0	0	33.3333	0	0	33.3333	0	33.3333	0	0	1
		Research institutions	50	0	50	0	0	0	0	0	75	16.6667	8.33333	0	0	2
	PT, N-E	Government actors	33.3333	0	66.6667	0	0	16.6667	5.55556	11.1111	22.2222	33.3333	11.1111	0	0	3
		Associations (national/local, of private owners)	87.5	0	12.5	0	0	5.55556	0	8.33333	47.2222	22.2222	16.6667	0	0	7
		SMEs (technical/forest services, trade)	100	0	0	0	0	16.6667	0	33.3333	50	0	0	0	0	1
	LATVIA	Government actors	66.6667	33.3333	0	0	0	27.7778	0	16.6667	33.3333	16.6667	5.55556	0	0	3
		Associations (industry, energy)	33.3333	33.3333	0	0	33.3333	50	0	11.1111	11.1111	5.55556	11.1111	0	11.1111	4
		Associations (biomass producers)	-	-	-	-	-	-	-	-	-	-	-	-	-	1
		Industry (forest, energy/utilities, pellet)	50	0	33.3333	0	16.6667	13.8889	0	8.33333	30.5556	27.7778	8.33333	8.33333	2.77778	11
		SMEs (technical/forest services, trade)	0	50	0	0	50	8.33333	0	0	33.3333	33.3333	25	0	0	10
		Private forest owners (industrial)	0	100	0	0	0	33.3333	0	0	33.3333	33.3333	0	0	0	1
		Research institutions	66.6667	0	0	0	33.3333	22.2222	0	11.1111	44.4444	16.6667	5.55556	0	0	3
	SLOVENIA	Government actors	0	25	0	75	0	0	10.4167	16.6667	10.4167	12.5	14.5833	12.5	22.9167	9.33333
		Associations (national/local, of private owners)	3.57143	28.5714	14.2857	53.5714	0	4.93827	7.40741	7.40741	16.0494	2.46914	17.9012	4.32099	39.5062	33.8333
		Industry (forest, energy/utilities)	0	100	0	0	0	100	0	0	0	0	0	0	0	1.16667
		SMEs (technical/forest services, trade)	0	0	0	100	0	0	8.33333	0	0	0	41.6667	0	50	2.33333
		Research institutions	0	0	0	100	0	0	50	0	0	0	33.3333	0	16.6667	1.16667
	GERMANY (Bavaria)	Government actors	42.5806	10.9677	23.2258	9.67742	13.5484	7.60234	9.59064	13.5673	30.5263	23.6257	6.54971	1.9883	6.54971	161
		Associations (tourism and nature conservation)	18.1818	0	72.7273	0	9.09091	5.55556	0	0	35.1852	40.7407	18.5185	0	0	11
		Associations (hunting, local/national)	53.3333	33.3333	0	0	13.3333	13.6364	4.54545	14.7727	17.0455	22.7273	13.6364	0	13.6364	15
		Associations (local, of private owners)	63.7097	8.06452	14.5161	3.22581	10.4839	5.01393	6.96379	13.0919	29.5265	28.1337	11.1421	1.67131	4.45682	63
		Associations (national/regional, of land owners)	30	10	40	0	20	0	0	13.0435	30.4348	15.2174	4.34783	0	36.9565	10
		Industry (forest, energy/utilities)	16.6667	25	41.6667	8.33333	8.33333	7.04225	2.8169	5.6338	32.3944	28.169	7.04225	0	16.9014	12
		SMEs (technical/forest services, trade)	61.5385	7.69231	17.9487	7.69231	5.12821	12.5	5.09259	15.2778	40.7407	12.963	0.925926	0.462963	12.037	39
		(Collective) Private forest owners	42.5532	25.5319	10.6383	2.12766	19.1489	12.0879	5.49451	12.0879	20.5128	13.5531	11.3553	3.2967	21.6117	50
		Research institutions	0	50	50	0	0	16.6667	16.6667	16.6667	0	50	0	0	0	2
	all	Government actors	55.0896	11.0753	25.2509	2.41935	6.16487	16.2524	9.34211	11.2622	30.7797	21.1842	8.58187	0.960039	1.63743	185.333
		Non-government actors	64.9716	8.78788	15.7229	0.883838	9.63384	14.0199	6.26606	8.00374	35.1701	20.6496	10.4336	1.45121	4.00581	294.5
Table S11	Primary facilitators and instruments: wind power facilities in rural areas 1.
			Thematic issue: Wind power facilities in forest areas
	region	actor type	main facilitators					most appropriate instruments								N
			State (Ministry)	Market (private economy)	Society (unions, associations, citizens´ initiatives)	individual citizens / forest owners	leave it to nature	laws (dictates, bans)	standards/norms	taxes / duties	positive financial incentives (subsidies, financing)	awareness raising, public relations	advice and training	exchange offers, contracts by private law	liberal formation of prices (supply, demand)
	SPAIN (Castilla y León)	Government actors	77.7778	22.2222	0	0	0	38.8889	25.9259	7.40741	11.1111	3.7037	0	3.7037	9.25926	9				>=20
		Associations (industry, energy)	50	0	0	50	0	25	50	0	25	0	0	0	0	2				>=30
		Associations (biomass producers)	100	0	0	0	0	50	0	0	33.3333	16.6667	0	0	0	1				>=50
		Associations (national/local, of private owners)	66.6667	0	0	0	33.3333	5.55556	33.3333	5.55556	27.7778	0	11.1111	0	16.6667	3				>=70
		Associations (professional/foresters' societies)	100	0	0	0	0	33.3333	0	0	16.6667	50	0	0	0	1
		Industry (forest, energy/utilities)	100	0	0	0	0	45.8333	45.8333	0	8.33333	0	0	0	0	4
		SMEs (technical/forest services, trade)	100	0	0	0	0	41.6667	41.6667	0	16.6667	0	0	0	0	2
		Private forest owners	100	0	0	0	0	33.3333	33.3333	0	33.3333	0	0	0	0	1
		Research institutions	0	100	0	0	0	50	25	8.33333	16.6667	0	0	0	0	2
	PT, N-E	Government actors	100	0	0	0	0	50	0	16.6667	16.6667	5.55556	0	0	11.1111	3
		Associations (national/local, of private owners)	28.5714	57.1429	14.2857	0	0	26.1905	4.7619	2.38095	14.2857	2.38095	4.7619	21.4286	23.8095	7
		SMEs (technical/forest services, trade)	0	100	0	0	0	16.6667	0	50	0	0	0	33.3333	0	1
	LATVIA	Government actors	100	0	0	0	0	50	16.6667	5.55556	16.6667	5.55556	0	0	5.55556	3
		Associations (industry, energy)	100	0	0	0	0	25	0	12.5	25	12.5	0	0	25	4
		Associations (biomass producers)	100	0	0	0	0	16.6667	0	0	33.3333	0	50	0	0	1
		Industry (forest, energy/utilities, pellet)	45.4545	54.5455	0	0	0	28.7879	0	3.0303	25.7576	4.54545	13.6364	0	24.2424	11
		SMEs (technical/forest services, trade)	50	50	0	0	0	36.6667	0	0	21.6667	13.3333	6.66667	0	21.6667	10
		Private forest owners (industrial)	0	100	0	0	0	0	0	33.3333	33.3333	0	0	0	33.3333	1
		Research institutions	66.6667	33.3333	0	0	0	22.2222	5.55556	11.1111	33.3333	5.55556	5.55556	0	16.6667	3
	SLOVENIA	Government actors	-	-	-	-	-	-	-	-	-	-	-	-	-	-
		Associations (national/local, of private owners)	-	-	-	-	-	-	-	-	-	-	-	-	-	-
		Industry (forest, energy/utilities)	-	-	-	-	-	-	-	-	-	-	-	-	-	-
		SMEs (technical/forest services, trade)	-	-	-	-	-	-	-	-	-	-	-	-	-	-
		Research institutions	-	-	-	-	-	-	-	-	-	-	-	-	-	-
	GERMANY (Bavaria)	Government actors	69.375	5	21.875	2.5	1.25	43.5016	13.2116	3.65199	12.0301	19.334	4.83351	1.61117	1.82599	161
		Associations (tourism and nature conservation)	88.8889	0	11.1111	0	0	27.7778	24.0741	0	3.7037	44.4444	0	0	0	11
		Associations (hunting, local/national)	50	8.33333	8.33333	33.3333	0	34.5238	9.52381	0	19.0476	19.0476	4.7619	9.52381	3.57143	15
		Associations (local, of private owners)	48.3871	4.83871	24.1935	22.5806	0	40.2116	16.1376	0.529101	11.1111	19.3122	3.1746	6.61376	2.91005	63
		Associations (national/regional, of land owners)	40	0	30	20	10	40	8.33333	0	23.3333	15	1.66667	8.33333	3.33333	10
		Industry (forest, energy/utilities)	75	8.33333	8.33333	8.33333	0	43.0556	1.38889	2.77778	8.33333	29.1667	2.77778	8.33333	4.16667	12
		SMEs (technical/forest services, trade)	60.2564	5.12821	8.97436	25.641	0	37.6106	9.29204	1.76991	16.8142	16.8142	9.73451	4.42478	3.53982	39
		(Collective) Private forest owners	55.3191	10.6383	12.766	19.1489	2.12766	44.5578	7.14286	1.70068	12.585	19.3878	5.78231	4.42177	4.42177	50
		Research institutions	100	0	0	0	0	41.6667	0	0	16.6667	41.6667	0	0	0	2
	all	Government actors	86.7882	6.80556	5.46875	0.625	0.3125	45.5976	13.951	8.3204	14.1186	8.53722	1.20838	1.32872	6.93798	176
		Non-government actors	53.2211	31.1377	7.07578	6.74385	1.82157	32.066	12.5285	4.12959	17.7881	8.79414	5.15242	7.14866	12.3926	256
Table S12	Primary facilitators and instruments: the role of hunting in forest management 1.
			Thematic issue: The role of hunting in forest management
	region	actor type	main facilitators					most appropriate instruments								N
			State (Ministry)	Market (private economy)	Society (unions, associations, citizens´ initiatives)	individual citizens / forest owners	leave it to nature	laws (dictates, bans)	standards/norms	taxes / duties	positive financial incentives (subsidies, financing)	awareness raising, public relations	advice and training	exchange offers, contracts by private law	liberal formation of prices (supply, demand)
	SPAIN (Castilla y León)	Government actors	55.5556	11.1111	11.1111	22.2222	0	31.4815	31.4815	1.85185	3.7037	7.40741	12.963	11.1111	0	9				>=20
		Associations (industry, energy)	50	0	0	50	0	25	50	0	25	0	0	0	0	2				>=30
		Associations (biomass producers)	100	0	0	0	0	66.6667	0	33.3333	0	0	0	0	0	1				>=50
		Associations (national/local, of private owners)	66.6667	33.3333	0	0	0	16.6667	5.55556	16.6667	11.1111	5.55556	16.6667	22.2222	5.55556	3				>=70
		Associations (professional/foresters' societies)	100	0	0	0	0	50	0	0	0	33.3333	16.6667	0	0	1
		Industry (forest, energy/utilities)	75	0	0	25	0	33.3333	41.6667	0	12.5	12.5	0	0	0	4
		SMEs (technical/forest services, trade)	50	0	0	50	0	25	0	0	16.6667	33.3333	25	0	0	2
		Private forest owners	100	0	0	0	0	33.3333	33.3333	16.6667	0	0	0	16.6667	0	1
		Research institutions	100	0	0	0	0	50	41.6667	8.33333	0	0	0	0	0	2
	PT, N-E	Government actors	33.3333	0	33.3333	33.3333	0	33.3333	22.2222	0	5.55556	16.6667	22.2222	0	0	3
		Associations (national/local, of private owners)	37.5	0	37.5	25	0	35.7143	4.7619	0	7.14286	9.52381	26.1905	16.6667	0	7
		SMEs (technical/forest services, trade)	100	0	0	0	0	16.6667	0	0	0	33.3333	0	0	50	1
	LATVIA	Government actors	50	0	50	0	0	58.3333	8.33333	8.33333	0	16.6667	8.33333	0	0	3
		Associations (industry, energy)	0	50	0	0	50	38.4615	0	0	0	15.3846	23.0769	0	23.0769	4
		Associations (biomass producers)	-	-	-	-	-	-	-	-	-	-	-	-	-	1
		Industry (forest, energy/utilities, pellet)	0	0	87.5	12.5	0	18.6047	0	9.30233	6.97674	39.5349	25.5814	0	0	11
		SMEs (technical/forest services, trade)	0	0	0	100	0	33.3333	0	0	0	16.6667	50	0	0	10
		Private forest owners (industrial)	100	0	0	0	0	33.3333	33.3333	33.3333	0	0	0	0	0	1
		Research institutions	0	0	33.3333	33.3333	33.3333	44.4444	0	5.55556	0	27.7778	22.2222	0	0	3
	SLOVENIA	Government actors	37.5	0	25	37.5	0	43.75	6.25	0	8.33333	14.5833	22.9167	0	4.16667	9.33333
		Associations (national/local, of private owners)	53.5714	7.14286	0	39.2857	0	64.1975	6.17284	4.93827	4.93827	8.02469	4.93827	1.23457	5.55556	33.8333
		Industry (forest, energy/utilities)	100	0	0	0	0	0	100	0	0	0	0	0	0	1.16667
		SMEs (technical/forest services, trade)	0	0	50	50	0	75	25	0	0	0	0	0	0	2.33333
		Research institutions	100	0	0	0	0	50	0	0	0	33.3333	16.6667	0	0	1.16667
	GERMANY (Bavaria)	Government actors	57.2289	1.80723	11.4458	27.7108	1.80723	38.07	10.0742	0.742312	6.46872	26.4051	16.5429	0.424178	1.27253	161
		Associations (tourism and nature conservation)	90.9091	0	9.09091	0	0	27.2727	0	0	4.54545	36.3636	31.8182	0	0	11
		Associations (hunting, local/national)	12.5	6.25	12.5	68.75	0	24.6914	13.5802	0	1.23457	16.0494	24.6914	9.87654	9.87654	15
		Associations (local, of private owners)	52.459	0	13.1148	34.4262	0	33.3333	15.5738	1.63934	7.10383	20.765	16.6667	3.82514	1.0929	63
		Associations (national/regional, of land owners)	40	0	10	40	10	37.931	3.44828	3.44828	10.3448	25.8621	13.7931	0	5.17241	10
		Industry (forest, energy/utilities)	83.3333	0	0	16.6667	0	31.9444	18.0556	5.55556	5.55556	16.6667	16.6667	5.55556	0	12
		SMEs (technical/forest services, trade)	31.5789	0	28.9474	36.8421	2.63158	35.5856	17.1171	0.900901	13.0631	12.6126	16.6667	2.7027	1.35135	39
		(Collective) Private forest owners	28	2	16	54	0	35.4386	12.6316	0.701754	6.31579	16.8421	14.7368	2.45614	10.8772	50
		Research institutions	100	0	0	0	0	33.3333	0	0	0	16.6667	50	0	0	2
	all	Government actors	46.7236	2.58367	26.178	24.1533	0.361446	40.9936	15.6723	2.1855	4.81226	16.3458	16.5956	2.30706	1.08784	185.333
		Non-government actors	44.4472	4.03333	21.0583	27.5944	2.86667	38.3158	11.0437	4.22184	6.38864	15.7623	15.456	4.84464	3.96712	294.5
	1 Source: Own data/calculations, Aurenhammer (2017). Legend: blue = 20 to 29%, green = 30 to 49%, yellow = 50 to 69%, orange = 70+%. All values refer to the distribution of points for either the ‘main facilitators’ or ‘most appropriate instruments’.

## Sheet: Table S13
Table S13	Actor perceptions on the facilitation of future forest problems (part three of the quantitative SNA, sheet five)
5.)	Who should primarily facilitate questions of the future utilization of forests and how can regulation be done best?
	a.) Please choose ONE institution/body for each aspect, to take care of the aspect primarily - insert "1" to the respective column (C-G).
	b.) For the same aspects, please mention max. 3 instruments which should be preferred, in your opinion - allocate altogether 6 points (columms H-O)
	B	C	D	E	F	G	H	I	J	K	L	M	N	O
	Aspects of future forest utilization:	Who should facilitate this primarily? (Choose respectively 1 preferred institution/intercessional instance: 1 = priority, empty = no priority)					How can it be done best in the future? - which (new) instruments should be used? (Please choose max. 3 instruments and allocate altogether 6 points)
		State (administration)	Market (private economy)	Society (unions, associations, citizens´ initiatives)	individual citizens/forest owners	leave it to nature	laws (dictates, bans)	standards	taxes/duties	positive financial incentives (subsidies, financing)	awareness raising, public relations	advice and training	exchange offers, contracts by private law	liberal formation of prices (supply, demand)
	Example aspect X	1					1			3	2				=6
1	Wind power facilities in forest areas
2	The role of hunting in forest management
3	Roundwood production from private forests
4	Role of ecosystem services (water, air, carbon) of forests
5	Adaption of forests to climate change
6	Nature conservation on private forest land
7	Role of new leisure activities in forests (i.e. mountainbiking, geo-caching)
8	Roundwood commercialisation from private forests
9	Population development in rural regions
10	Roundwood production and energy transition
11	(New) areas of application for wood
12	Challenges, caused by climate change, to the provision of protection of soil or infrastructure by private forests
	c.) Do you have an exemplary proposal for a solution for an aspect specifically important to you?
														page 5
